# Supplementary material for: Persistent high PM pollution in the Eastern Mediterranean and Middle East: Insights from long-term observations and source apportionment in Cyprus
Source: Copernicus journal article supplement (doi:10.5194/egusphere-2025-3234), 2025-07-16
Supplement: Supplementary file 1 [file egusphere-2025-3234-supplement.pdf]

1 **Supplements to: “Persistent high PM pollution in the Eastern Mediterranean**  
2 **and Middle East: Insights from long-term observations and source**  
3 **apportionment in Cyprus.”**

4  
5 Elie Bimenyimana<sup>1</sup>, Jean Sciare<sup>1</sup>, Michael Pikridas<sup>1</sup>, Konstantina Oikonomou<sup>1</sup>, Minas Iakovides<sup>1</sup>, Emily Vasiliadou<sup>3</sup>,  
6 Chrysanthos Savvides<sup>3</sup>, and Nikos Mihalopoulos<sup>1,2</sup>.

7  
8 <sup>1</sup>*Climate and Atmosphere Research Centre (CARE-C), The Cyprus Institute, Nicosia, Cyprus.*

9 <sup>2</sup>*National Observatory of Athens, Athens, Greece.*

10 <sup>3</sup>*Department of Labour Inspection, Ministry of Labour and Social Insurance, Nicosia, Cyprus.*

11

12

13 *Table S1. Information on PM chemical speciation data availability from 2005 to 2023 at AMX and NICTRA.*

| Site and size           |        | 05 | 06 | 07 | 08 | 09 | 10 | 11 | 12 | 13 | 14 | 15 | 16 | 17 | 18 | 19 | 20 | 21 | 22 | 23 |
|-------------------------|--------|----|----|----|----|----|----|----|----|----|----|----|----|----|----|----|----|----|----|----|
| AMX-PM <sub>2.5</sub>   | Mass   |    |    |    |    |    |    |    |    |    |    |    |    |    |    |    |    |    |    |    |
|                         | Ions   |    |    |    |    |    |    |    |    |    |    |    |    |    |    |    |    |    |    |    |
|                         | OC/EC  |    |    |    |    |    |    |    |    |    |    |    |    |    |    |    |    |    |    |    |
|                         | Metals |    |    |    |    |    |    |    |    |    |    |    |    |    |    |    |    |    |    |    |
| AMX-PM <sub>10</sub>    | Mass   |    |    |    |    |    |    |    |    |    |    |    |    |    |    |    |    |    |    |    |
|                         | Ions   |    |    |    |    |    |    |    |    |    |    |    |    |    |    |    |    |    |    |    |
|                         | OC/EC  |    |    |    |    |    |    |    |    |    |    |    |    |    |    |    |    |    |    |    |
|                         | Metals |    |    |    |    |    |    |    |    |    |    |    |    |    |    |    |    |    |    |    |
| NICTRA-PM <sub>10</sub> | Mass   |    |    |    |    |    |    |    |    |    |    |    |    |    |    |    |    |    |    |    |
|                         | Ions   |    |    |    |    |    |    |    |    |    |    |    |    |    |    |    |    |    |    |    |
|                         | OC/EC  |    |    |    |    |    |    |    |    |    |    |    |    |    |    |    |    |    |    |    |
|                         | Metals |    |    |    |    |    |    |    |    |    |    |    |    |    |    |    |    |    |    |    |

14

15

16

17

18

19

20

21

22

23

24

25

26

Chemical mass closure  $PM_{2.5}$  AMX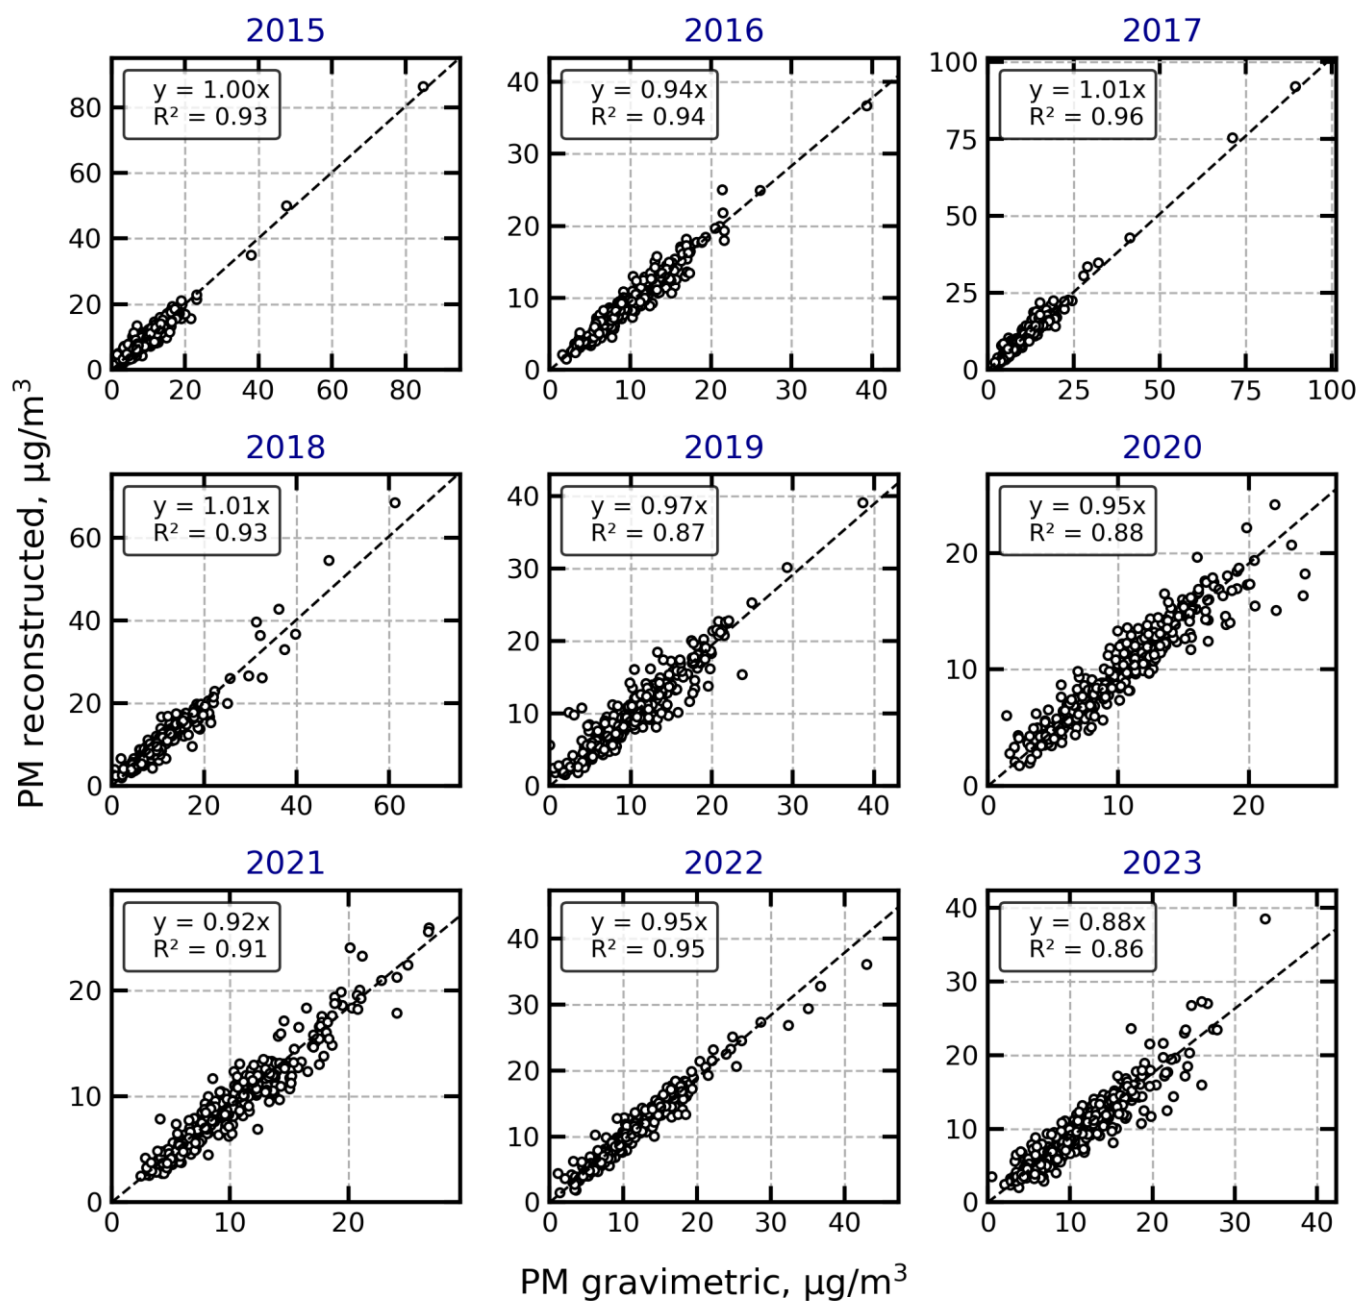Fig. S1-A.  $PM_{2.5}$  chemical mass closure at AMX for the period 2015-2023

## Chemical mass closure PM<sub>10</sub> AMX

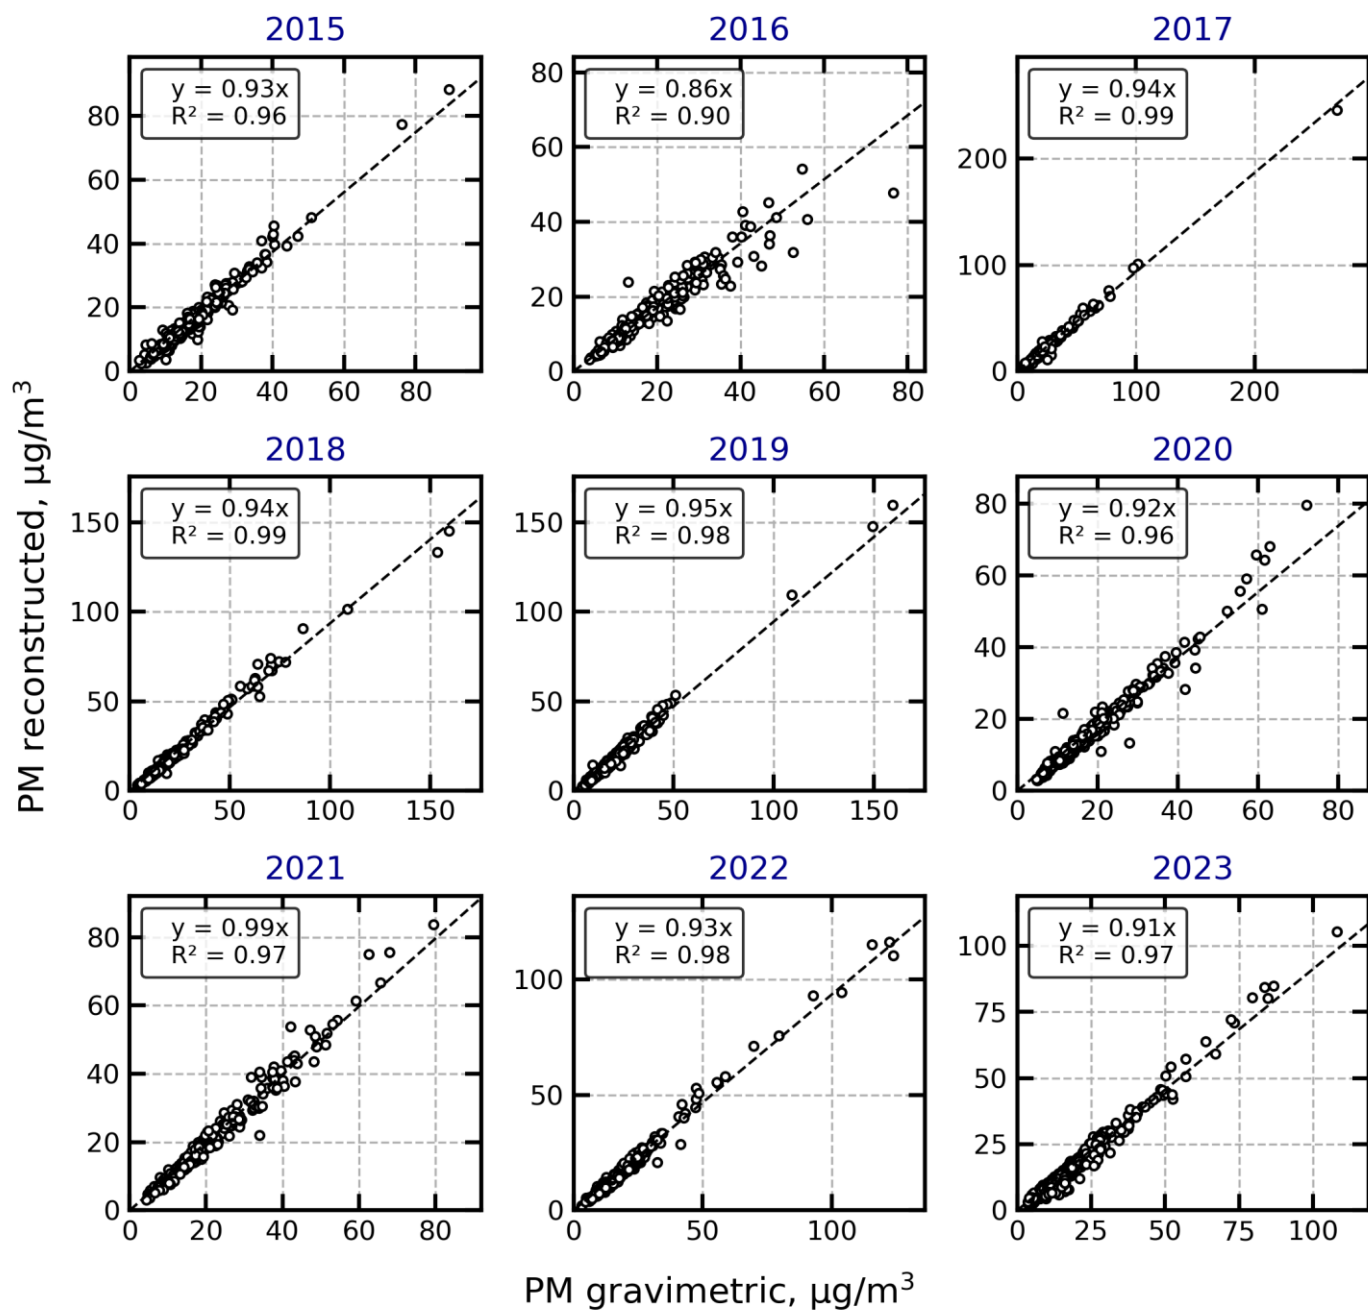

Fig. S1-B. PM<sub>10</sub> chemical mass closure at AMX for the period 2015-2023.

# Chemical mass closure $PM_{10}$ NICTRA

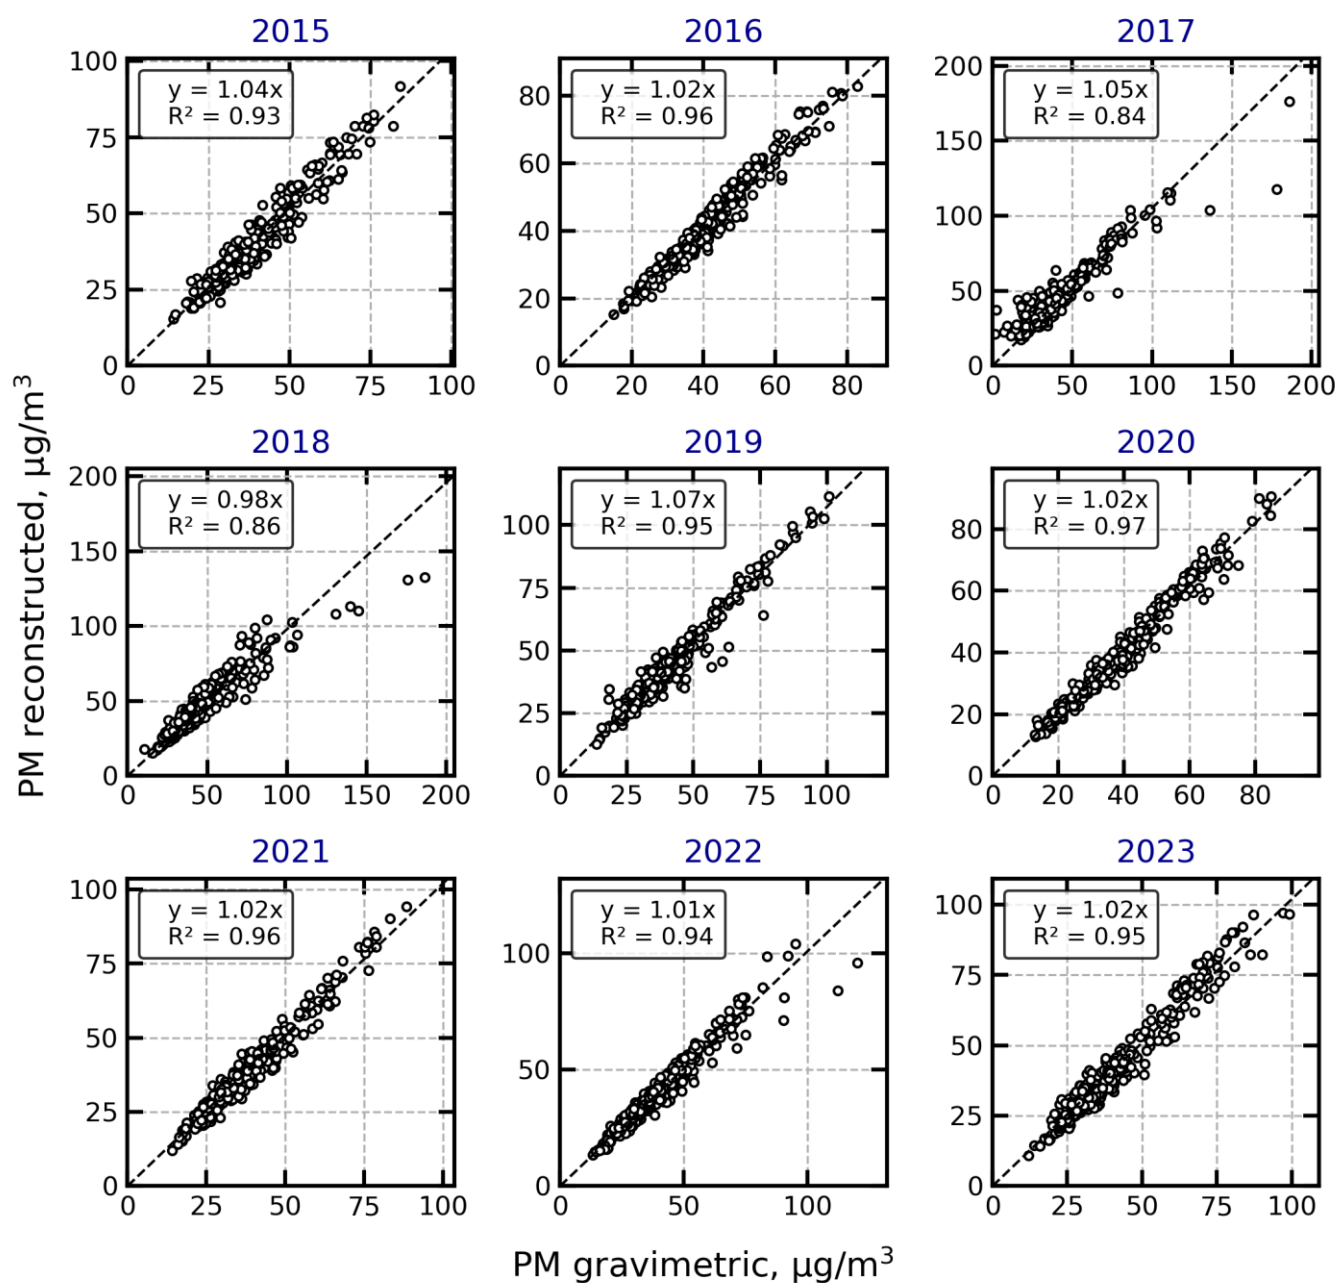

Fig. S1-C.  $PM_{10}$  chemical mass closure at NICTRA for the period 2015-2023.

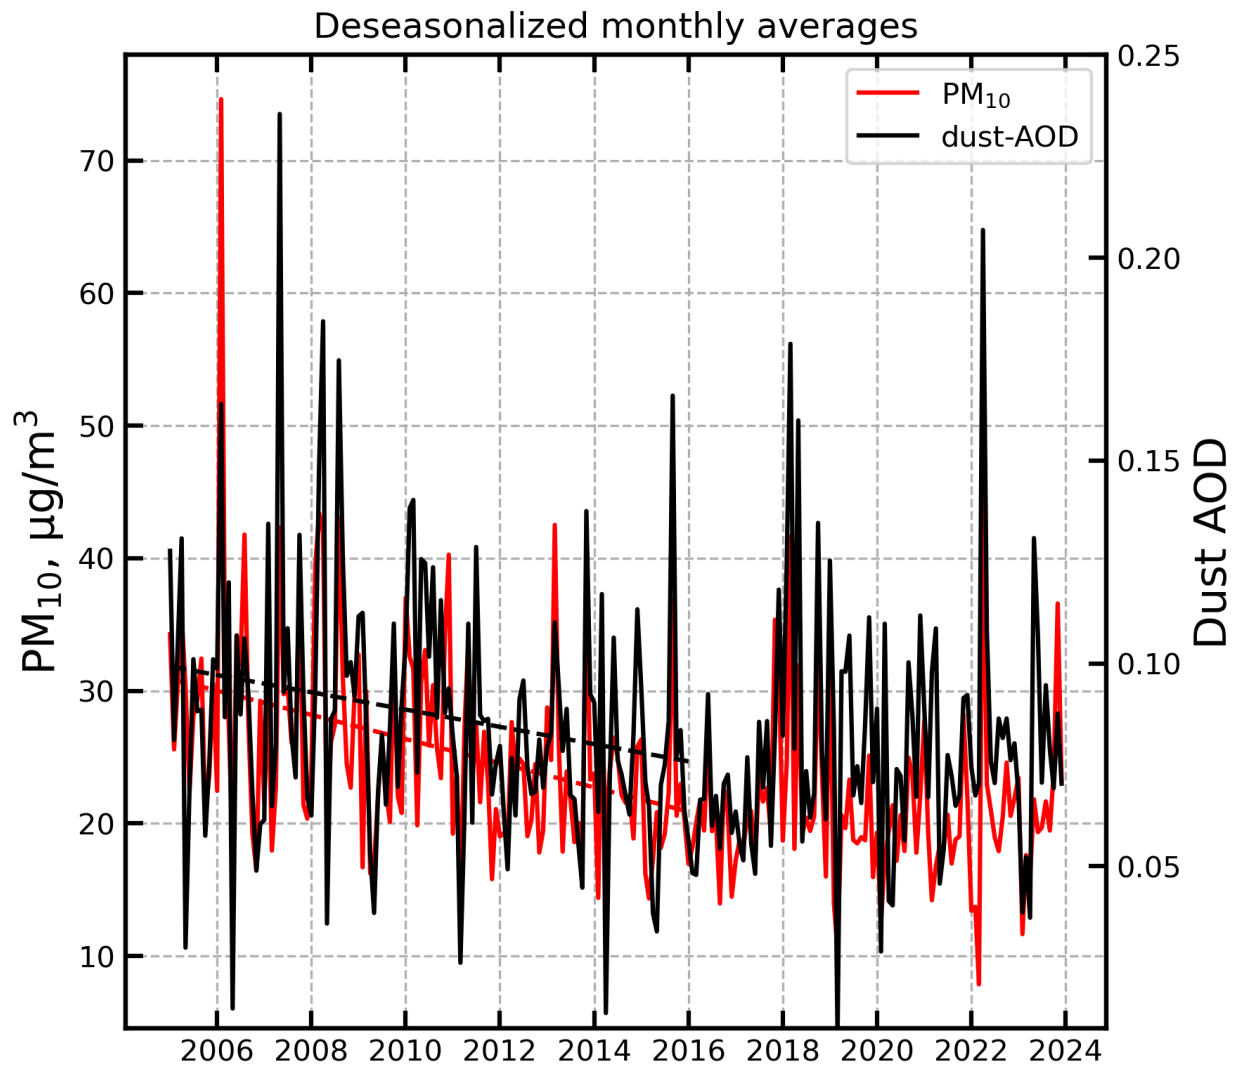

Fig. S2. Deseasonalized monthly averages of PM<sub>10</sub> concentrations measured at AMX and dust aerosol optical depth (AOD) over Cyprus from 2005 to 2023. Dust AOD values were retrieved from the MERRA-2 (Modern-Era Retrospective analysis for Research and Applications, Version 2) global atmospheric reanalysis dataset provided by NASA ([https://goldsmr4.gesdisc.eosdis.nasa.gov/data/MERRA2\\_MONTHLY/M2TMNXAER.5.12.4/](https://goldsmr4.gesdisc.eosdis.nasa.gov/data/MERRA2_MONTHLY/M2TMNXAER.5.12.4/)).

# Long-term trends in PM<sub>2.5</sub> composition at AMX

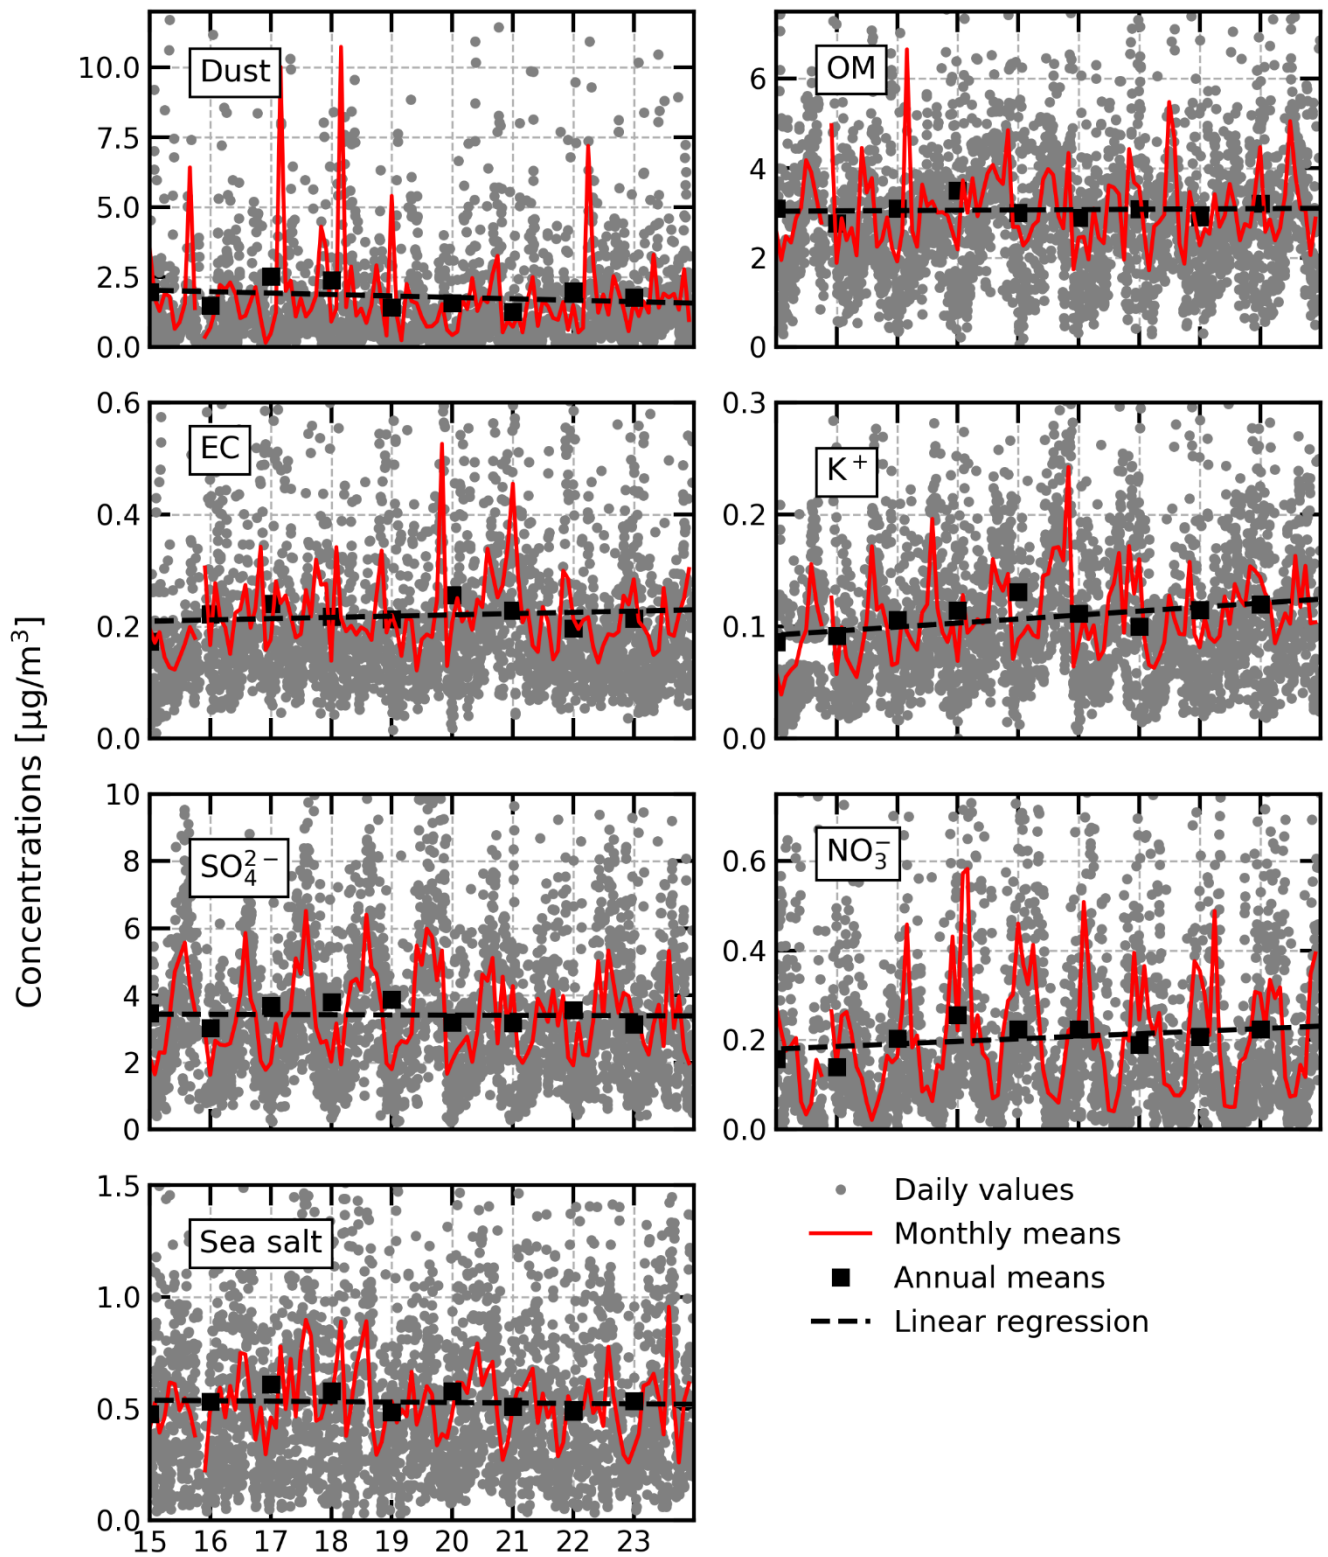

Fig. S3. Long-term variability of PM<sub>2.5</sub> chemical constituents at the regional background (AMX) for 2015-2023.



Long-term trends in PM<sub>10</sub> composition at AMX

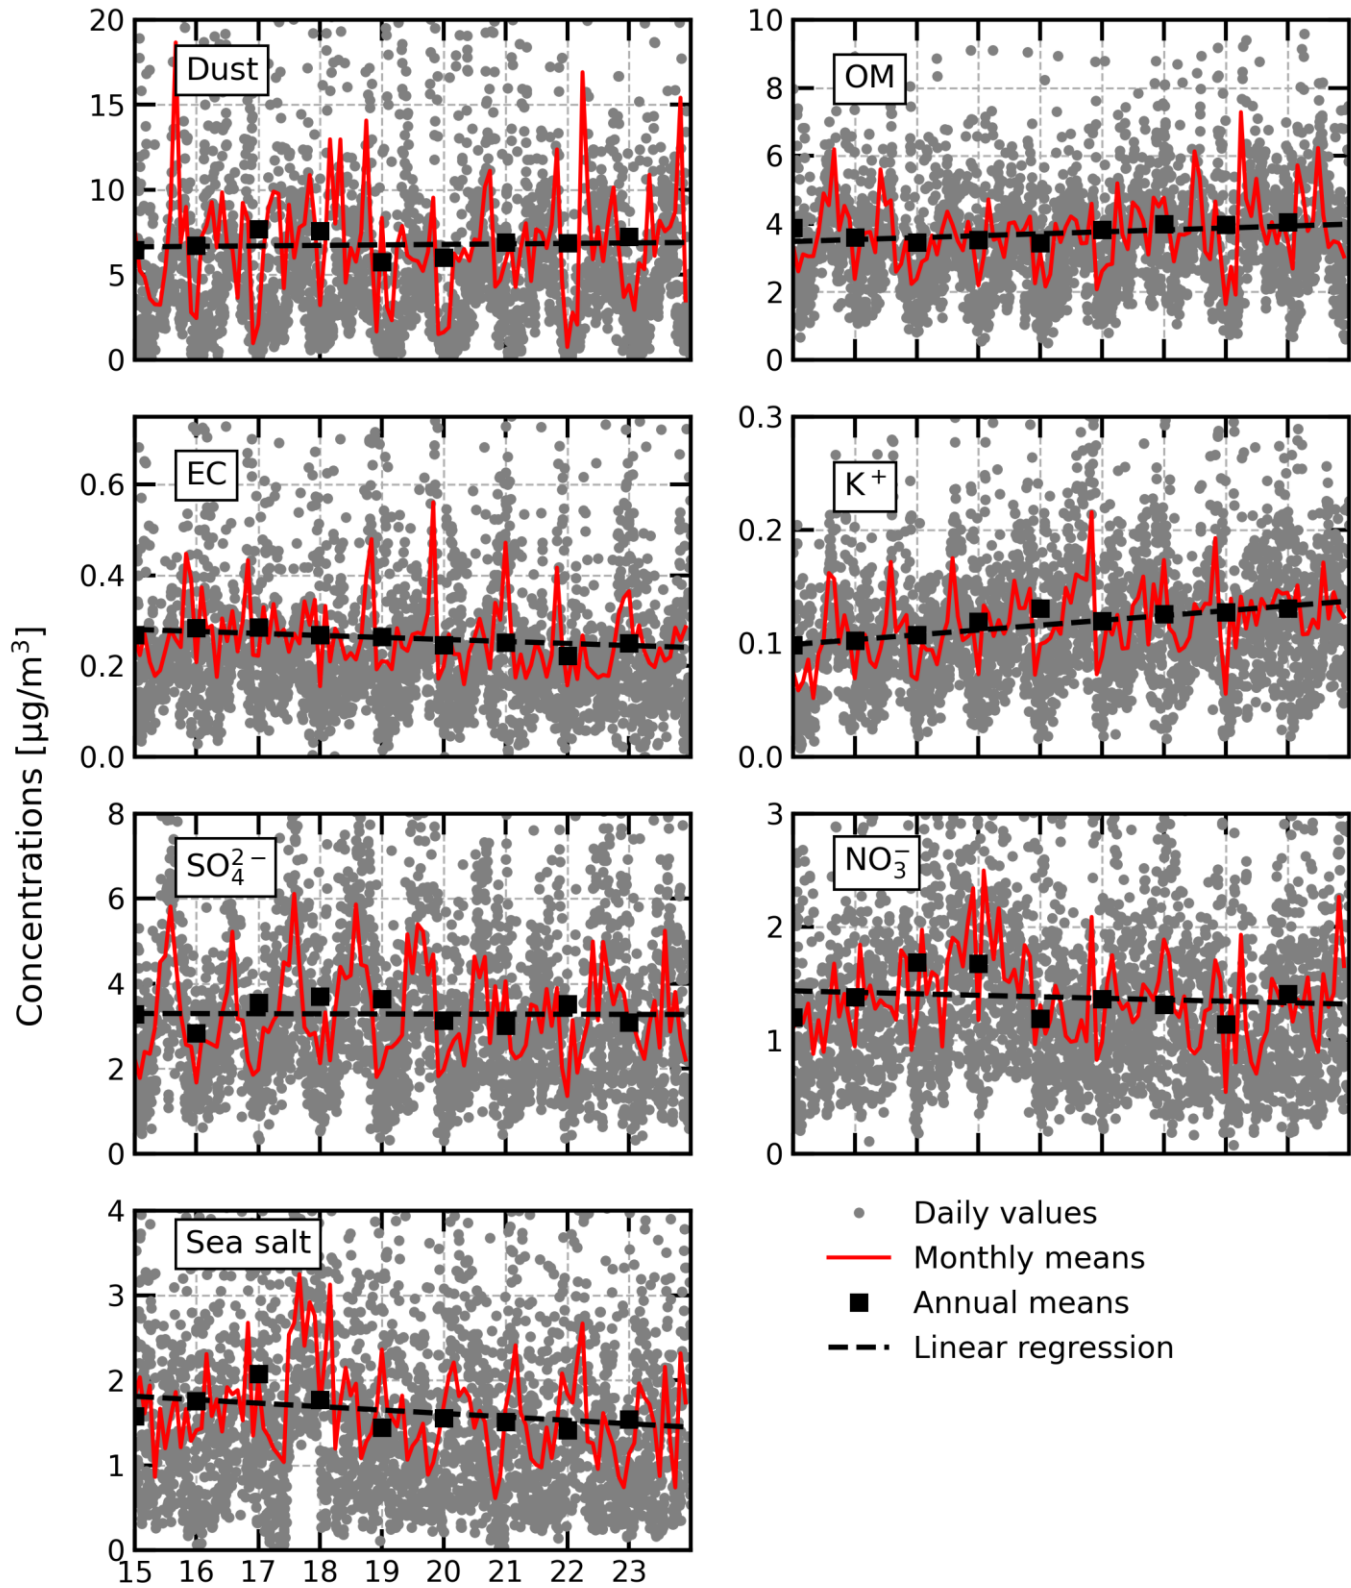

Fig. S4. Long-term variability of PM<sub>10</sub> chemical constituents at the regional background (AMX) for 2015-2023.

Long-term trends in PM<sub>10</sub> composition at NICTRA

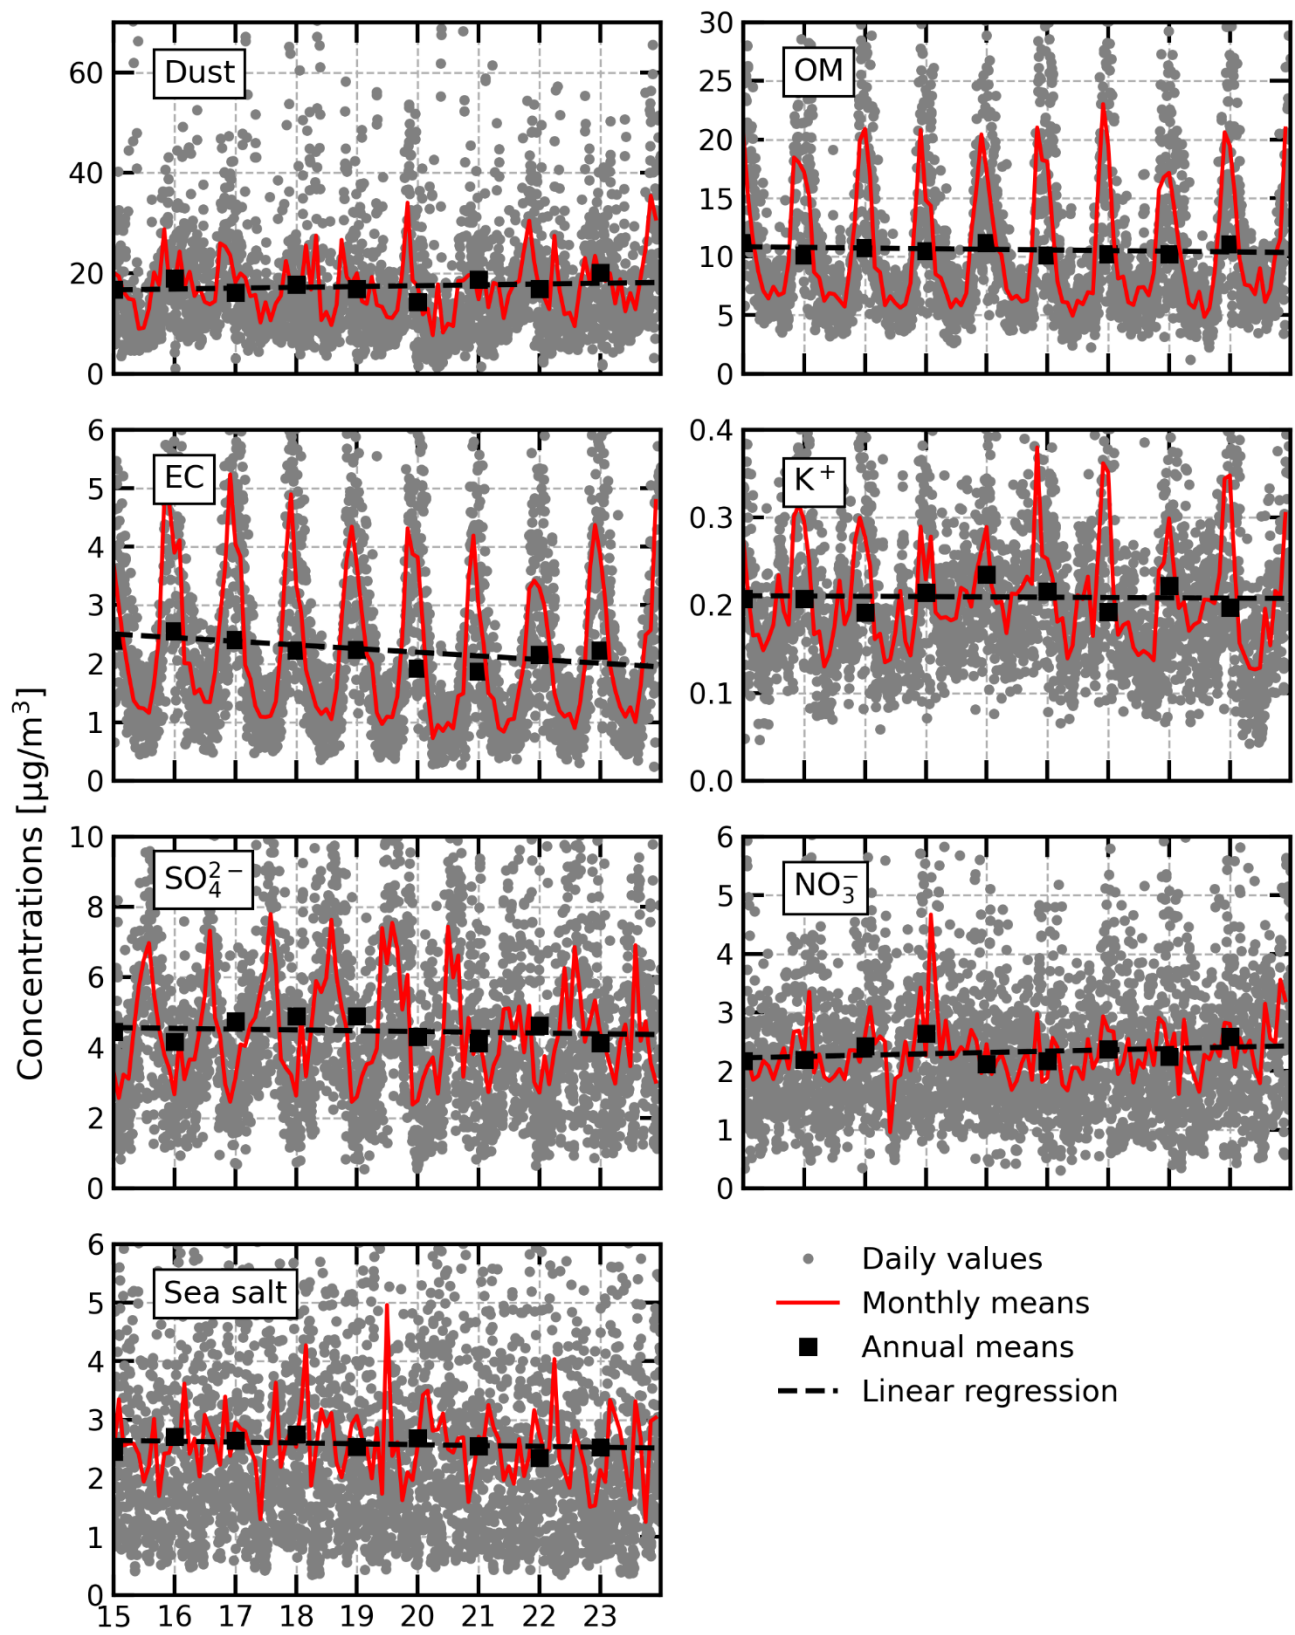

Fig. S5. Long-term variability of PM<sub>10</sub> constituents at the urban traffic site (NICTRA) for 2015-2023.



54  
55  
56  
57

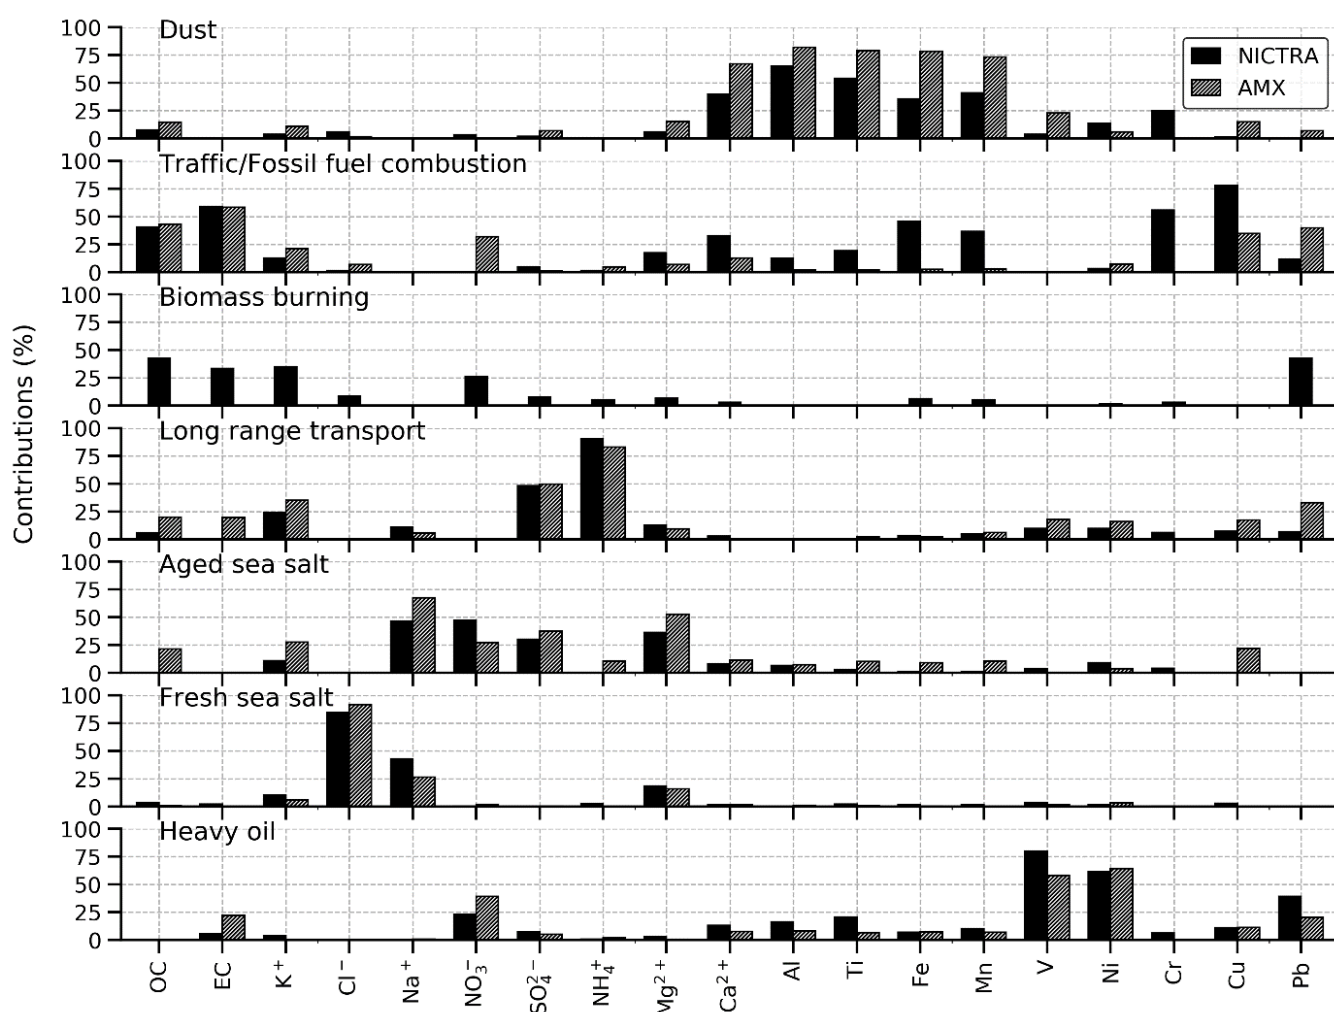

Fig. S6.  $PM_{10}$  source profiles resolved by Positive matrix factorization (PMF) from PM chemical composition data collected at two sampling sites (NICTRA and AMX) during the period 2015-2023. The traffic factor is resolved only for the traffic site (NICTRA), while Fossil fuel combustion is for the regional background (AMX).

58  
59  
60  
61  
62  
63

## Long-term trends in PM<sub>10</sub> sources at NICTRA

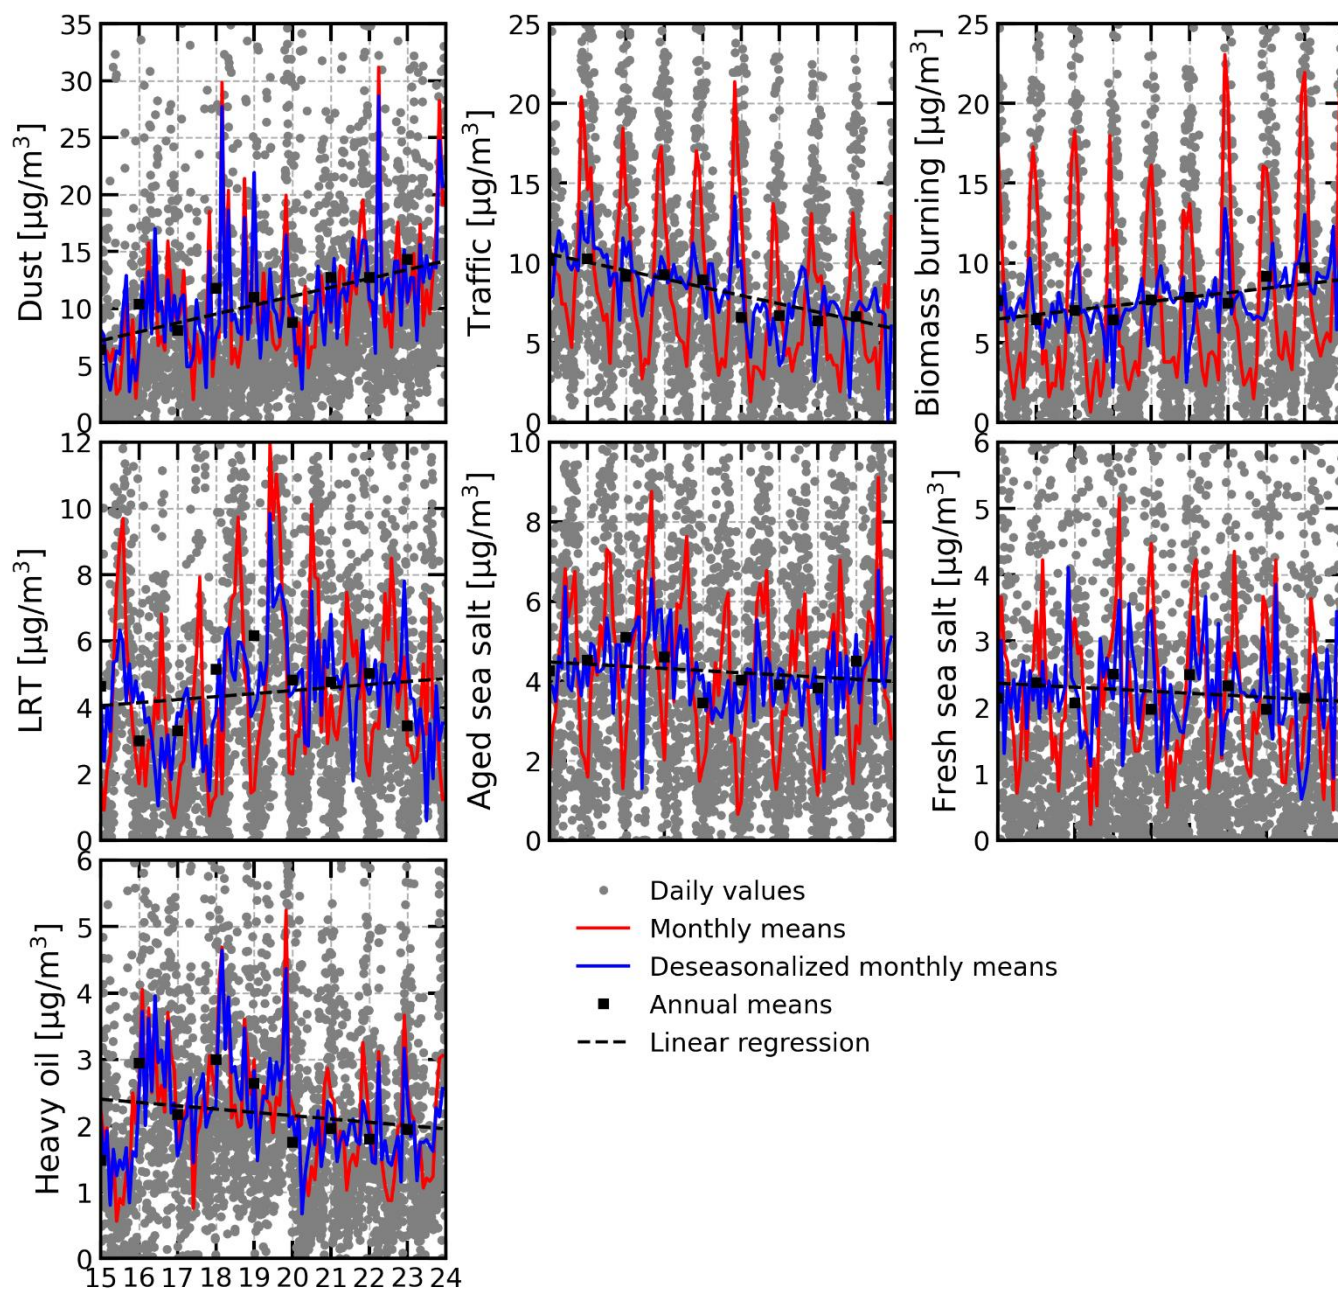

Fig. S7. Long-term trends in PM<sub>10</sub> sources resolved at NICTRA (Dust, Traffic, Biomass burning, Long range transport (LRT), Aged sea salt, Fresh sea salt and Heavy oil combustion).

### Long-term trends in PM<sub>10</sub> sources at AMX

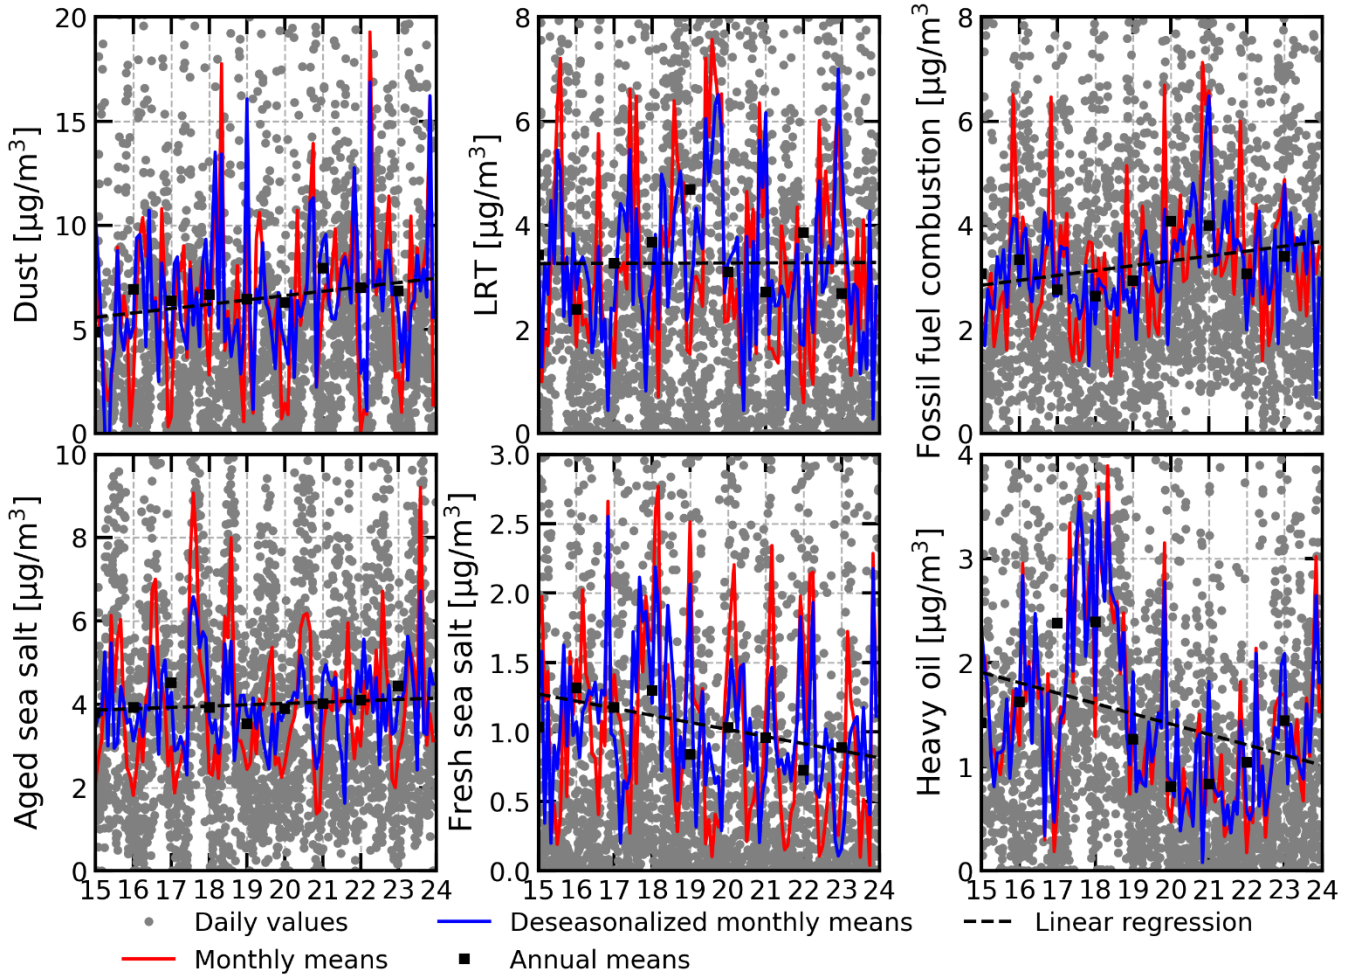

Fig. S8. Long-term trends in PM<sub>10</sub> sources resolved at AMX (Dust, Long range transport (LRT), Fossil fuel combustion, Aged sea salt, Fresh sea salt and Heavy oil combustion).

Table S2. Annual occurrences of air masses from different clusters at AMX regional background site.

|      | North Africa | Europe | Marine | Middle East | Turkey | West Turkey |
|------|--------------|--------|--------|-------------|--------|-------------|
| 2011 | 27           | 20     | 21     | 33          | 217    | 39          |
| 2012 | 45           | 25     | 24     | 48          | 187    | 27          |
| 2013 | 31           | 31     | 10     | 76          | 162    | 6           |
| 2014 | 51           | 43     | 17     | 48          | 118    | 70          |
| 2015 | 42           | 27     | 13     | 51          | 136    | 71          |
| 2016 | 43           | 25     | 21     | 29          | 144    | 83          |
| 2017 | 39           | 39     | 10     | 65          | 120    | 86          |
| 2018 | 43           | 53     | 12     | 79          | 108    | 65          |
| 2019 | 41           | 44     | 20     | 67          | 115    | 69          |
| 2020 | 54           | 49     | 7      | 65          | 95     | 89          |
| 2021 | 45           | 49     | 4      | 53          | 113    | 96          |
| 2022 | 57           | 26     | 3      | 56          | 110    | 105         |
| 2023 | 42           | 43     | 10     | 67          | 97     | 101         |

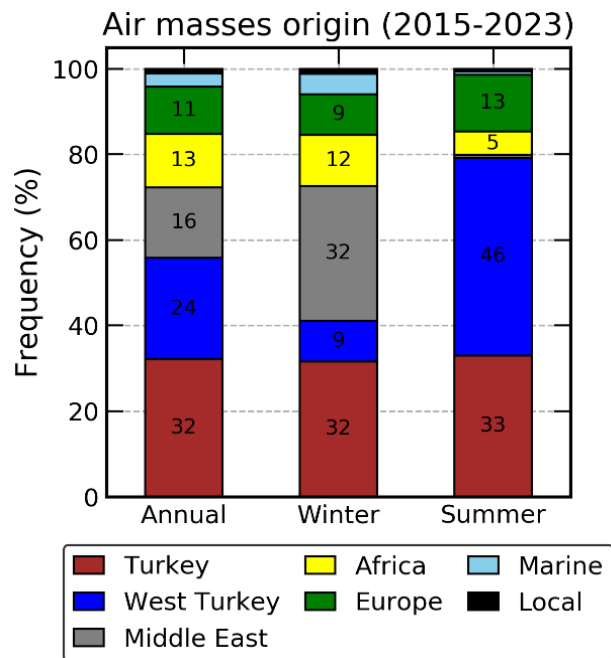

Fig. S9. Frequency of air mass occurrence at AMX regional background between 2015 and 2023.

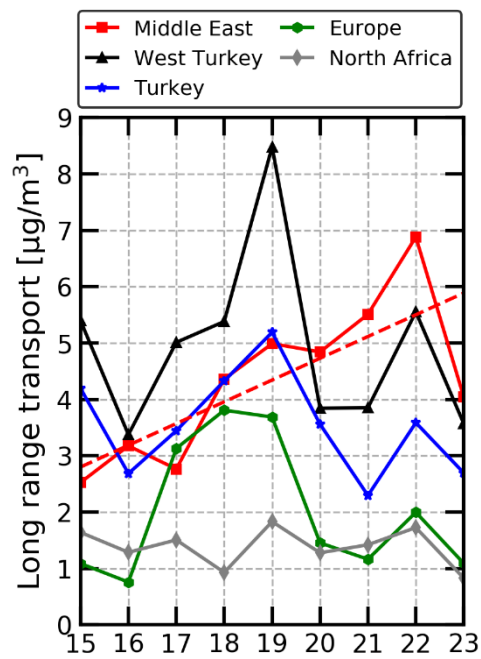

Fig. S10. Long-term evolution of long range transport (LRT) concentrations for different air mass sectors (Middle East, West Turkey, Turkey, Europe, and North Africa) at AMX from 2015 to 2023.
